# Supplementary material
Source: HighWire-hosted journal article supplement (https://bmjopen.bmj.com/content/14/2/e072498)
Supplement: inline-supplementary-material-1 [file inline-supplementary-material-1.pdf]

Figure 1Sup: Data sample flow chart

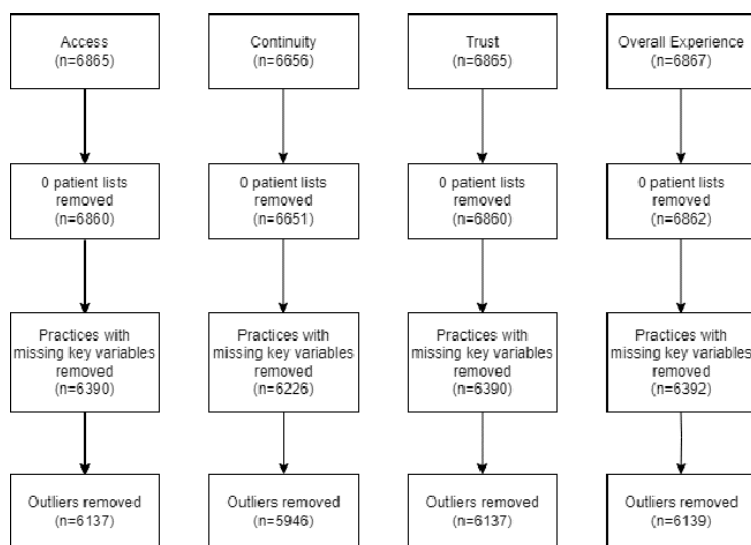

Table 1Sup: Extended practice characteristics for each outcome dataset

|                                                              | <i>Access</i>       | <i>Continuity</i>   | <i>Trust</i>        | <i>Overall Experience</i> |
|--------------------------------------------------------------|---------------------|---------------------|---------------------|---------------------------|
|                                                              | Total<br>(N=6137)   | Total<br>(N=5946)   | Total<br>(N=6137)   | Total<br>(N=6139)         |
| <i>Total NHS Payments (£)</i><br><i>Mean (SD)</i>            | 1,300,000 (806,000) | 1,320,000 (794,000) | 1,300,000 (806,000) | 1,300,000 (806,000)       |
| <i>Payments per Patient (£)</i><br><i>Mean (SD)</i>          | 152 (40.3)          | 152 (39.4)          | 152 (40.3)          | 152 (40.3)                |
| <i>Payments per Weighted Patient (£)</i><br><i>Mean (SD)</i> | 151 (35.4)          | 151 (34.7)          | 151 (35.4)          | 151 (35.4)                |
| <i>Contract Type n (%)</i><br><i>APMS</i>                    | 136 (2.2%)          | 125 (2.1%)          | 136 (2.2%)          | 136 (2.2%)                |

|                                                       |              |              |              |              |
|-------------------------------------------------------|--------------|--------------|--------------|--------------|
| <i>GMS</i>                                            | 4313 (70.3%) | 4176 (70.2%) | 4313 (70.3%) | 4315 (70.3%) |
| <i>PMS</i>                                            | 1688 (27.5%) | 1645 (27.7%) | 1688 (27.5%) | 1688 (27.5%) |
| <i>Unknown</i>                                        | 0 (0%)       | 0 (0%)       | 0 (0%)       | 0 (0%)       |
| <i>Dispensing n (%)</i>                               |              |              |              |              |
| <i>Yes</i>                                            | 860 (14.0%)  | 833 (14.0%)  | 860 (14.0%)  | 860 (14.0%)  |
| <i>No</i>                                             | 5277 (86.0%) | 5113 (86.0%) | 5277 (86.0%) | 5279 (86.0%) |
| <i>Unknown</i>                                        | 0 (0%)       | 0 (0%)       | 0 (0%)       | 0 (0%)       |
| <i>Rurality n (%)</i>                                 |              |              |              |              |
| <i>Rural</i>                                          | 919 (15.0%)  | 885 (14.9%)  | 919 (15.0%)  | 919 (15.0%)  |
| <i>Urban</i>                                          | 5218 (85.0%) | 5061 (85.1%) | 5218 (85.0%) | 5220 (85.0%) |
| <i>Registered Patients</i>                            |              |              |              |              |
| <i>Mean (SD)</i>                                      | 8640 (5220)  | 8790 (5150)  | 8640 (5220)  | 8640 (5220)  |
| <i>Weighted Patients</i>                              |              |              |              |              |
| <i>Mean (SD)</i>                                      | 8630 (5120)  | 8780 (5060)  | 8630 (5120)  | 8630 (5120)  |
| <i>FTE GPs per 10,000 patients (pts)</i>              |              |              |              |              |
| <i>Mean (SD)</i>                                      | 5.61 (2.20)  | 5.62 (2.19)  | 5.61 (2.20)  | 5.61 (2.20)  |
| <i>Total Patient number &gt; 65 yrs</i>               |              |              |              |              |
| <i>Mean (SD)</i>                                      | 1620 (1210)  | 1650 (1200)  | 1620 (1210)  | 1620 (1210)  |
| <i>% Patients with long-standing health condition</i> |              |              |              |              |
| <i>Mean (SD)</i>                                      | 51.3 (8.58)  | 51.3 (8.58)  | 51.3 (8.58)  | 51.3 (8.59)  |

|                                      |             |              |             |             |
|--------------------------------------|-------------|--------------|-------------|-------------|
| <i>Patient Experience rating (%)</i> |             |              |             |             |
| <i>Mean (SD)</i>                     | 69.1 (14.4) | 49.1 (18.5)  | 95.3 (3.80) | 83.4 (9.74) |
| <i>[Min, Max]</i>                    | [19.1, 100] | [2.14, 98.0] | [71.6, 100] | [32.2, 100] |
| <i>Response Rate (%)</i>             |             |              |             |             |
| <i>Mean (SD)</i>                     | 35.9 (10.8) | 36.0 (10.8)  | 35.9 (10.8) | 35.8 (10.8) |

Table 2Sup: Access, Continuity and Trust mediation models

|                                              | Access      |               | Continuity  |               | Trust       |               |
|----------------------------------------------|-------------|---------------|-------------|---------------|-------------|---------------|
|                                              | Coefficient | CI: 95%       | Coefficient | CI: 95%       | Coefficient | CI: 95%       |
| Unadjusted Model                             |             |               |             |               |             |               |
| <b>Direct Effect of predictor on outcome</b> | 0.044       | (0.037; 0.06) | 0.044       | (0.030; 0.06) | 0.007       | (0.006; 0.01) |
| <b>Total Effect of predictor on outcome</b>  | 0.062       | (0.053; 0.07) | 0.050       | (0.036; 0.06) | 0.013       | (0.010; 0.01) |
| <b>Indirect (Mediated) Effect</b>            | 0.016       | (0.013; 0.02) | 0.006       | (0.004; 0.01) | 0.005       | (0.004; 0.01) |
| Carr-Hill adjusted Model                     |             |               |             |               |             |               |
| <b>Direct Effect of predictor on outcome</b> | 0.048       | (0.037; 0.06) | 0.037       | (0.022; 0.06) | 0.007       | (0.004; 0.01) |

|                                              |       |                  |       |                  |       |                     |
|----------------------------------------------|-------|------------------|-------|------------------|-------|---------------------|
| <b>Total Effect of predictor on outcome</b>  | 0.060 | (0.048;<br>0.07) | 0.041 | (0.026;<br>0.06) | 0.010 | (0.0073;<br>0.01)   |
| <b>Indirect (Mediated) Effect</b>            | 0.011 | (0.009;<br>0.01) | 0.004 | (0.002;<br>0.01) | 0.003 | (0.0025;<br>0.0035) |
| Deprivation adjusted Model                   |       |                  |       |                  |       |                     |
| <b>Direct Effect of predictor on outcome</b> | 0.047 | (0.038;<br>0.06) | 0.045 | (0.030;<br>0.06) | 0.008 | (0.006;<br>0.010)   |
| <b>Total Effect of predictor on outcome</b>  | 0.061 | (0.053;<br>0.07) | 0.050 | (0.035;<br>0.06) | 0.012 | (0.010;<br>0.014)   |
| <b>Indirect (Mediated) Effect</b>            | 0.015 | (0.012;<br>0.02) | 0.005 | (0.003;<br>0.01) | 0.004 | (0.003;<br>0.005)   |
